# Supplementary material
Source: Springer Nature journal article supplement (https://www.springermedizin.de/resource/supplementary/12889_2012_4350_MOESM3_ESM.pdf/9491818)

### Less severe violence

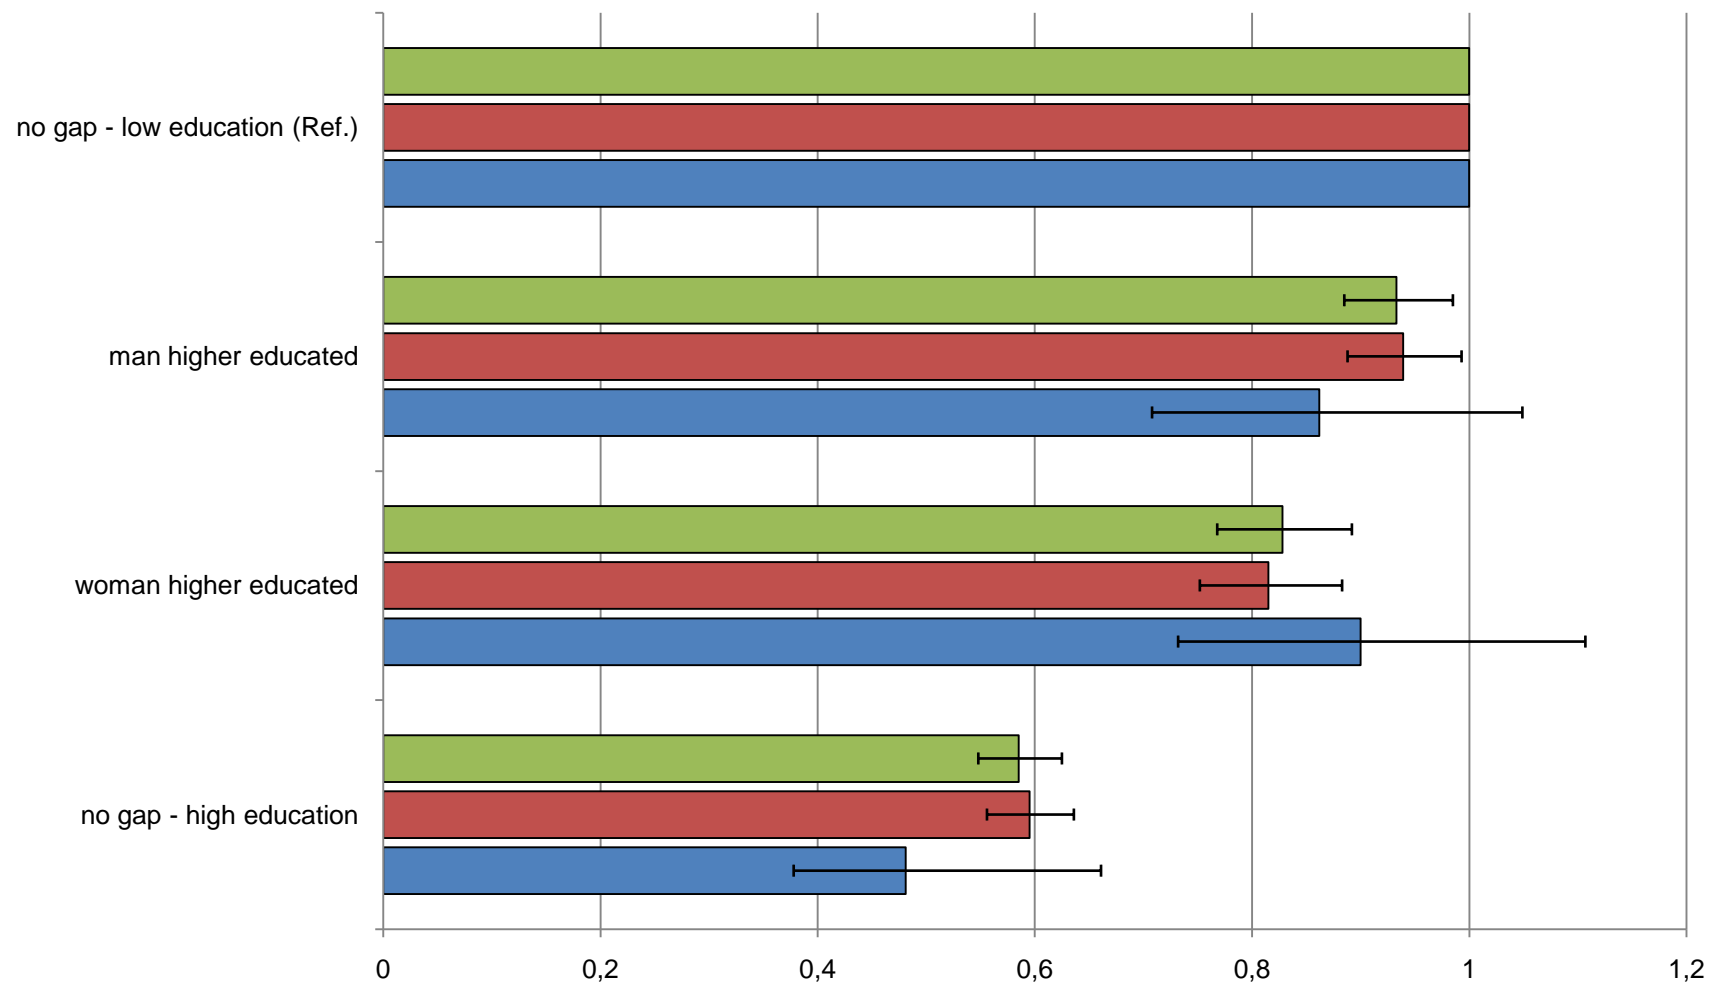

Supplement: MOESM3 [file 9491818]
